# Supplementary material for: Hydrogenated derivatives of hexacoordinated metallic Cu2Si monolayer
Source: Royal Society of Chemistry journal article supplement (doi:10.1039/c8ra07824f), 2018-01-01
Supplement: c8ra07824f1.pdf [file c8ra07824f1.pdf]

## Supplemental Material for: Hydrogenated Derivatives of Hexacoordinated Metallic Monolayer Cu<sub>2</sub>Si

E. Unsal,<sup>1,\*</sup> F. Iyikanat,<sup>1</sup> H. Sahin,<sup>2,3</sup> and R. T. Senger<sup>1,2</sup>

<sup>1</sup>*Department of Physics, Izmir Institute of Technology, 35430, Izmir, Turkey*

<sup>2</sup>*ICTP-ECAR Eurasian Center for Advanced Research,  
Izmir Institute of Technology, 35430, Izmir, Turkey*

<sup>3</sup>*Department of Photonics, Izmir Institute of Technology, 35430, Izmir, Turkey*

# I. PHONON BAND STRUCTURES OF HYDROGENATED DERIVATIVES OF $\text{Cu}_2\text{Si}$ WITH VARIOUS HYDROGEN CONCENTRATIONS

Geometries of several hydrogenated derivatives of  $\text{Cu}_2\text{Si}$  with different hydrogen concentrations are optimized. In order to analyze their dynamical stability, their phonon band structures are calculated. As it is seen from FIG. S1 and FIG. S2, these hydrogenated structures are found to be dynamically unstable since all of them include some negative frequency domains in their phonon branches.

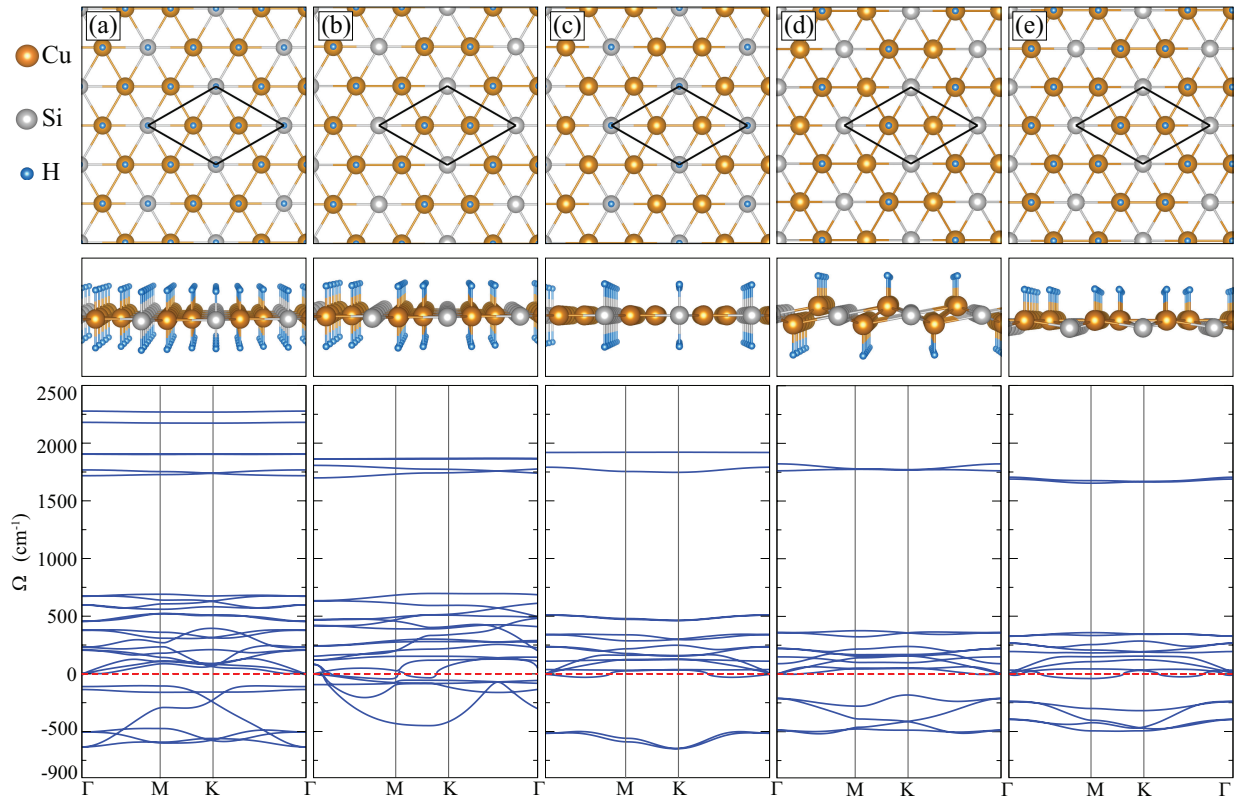

FIG. S1 (Color online) Optimized geometries and their calculated phonon band dispersion of several hydrogenated derivatives of monolayer  $\text{Cu}_2\text{Si}$ . Black rhombuses represent the unit cells.

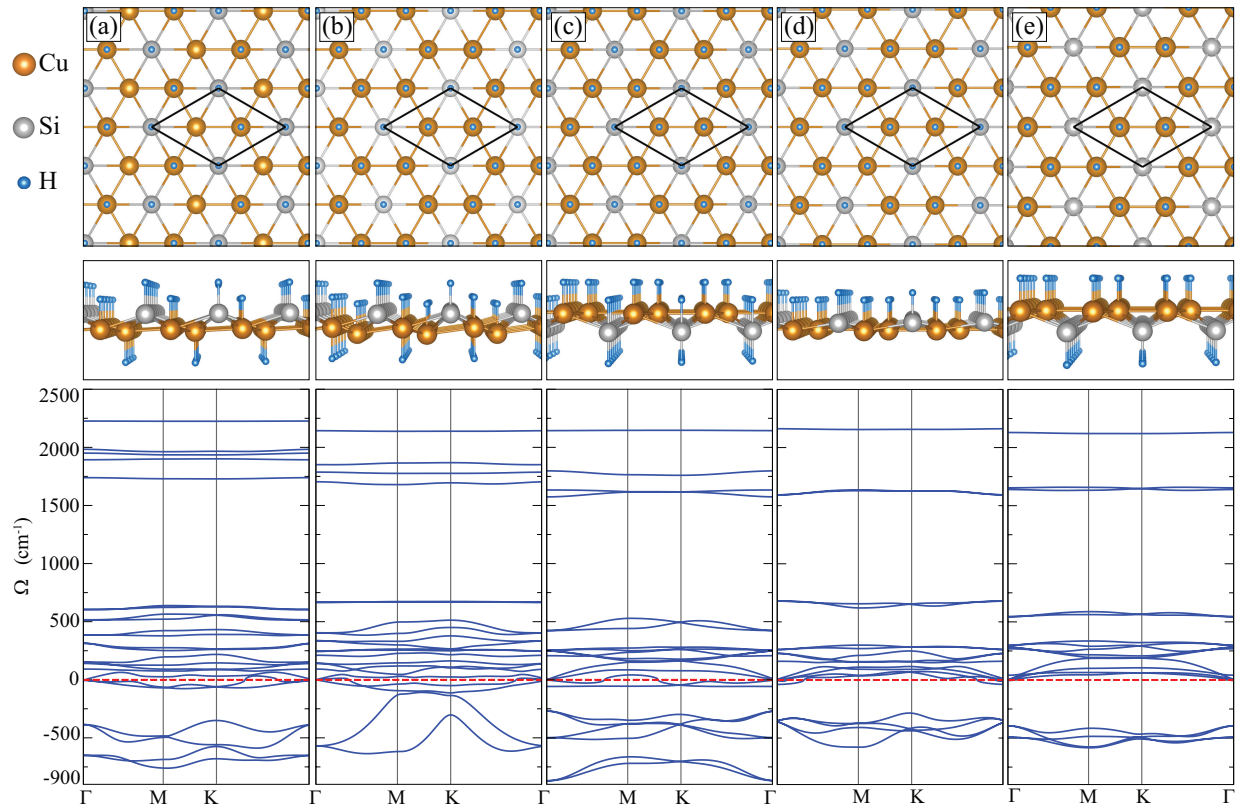

FIG. S2 (Color online) Same as FIG. S1
